# Supplementary material
Source: Royal Society of Chemistry journal article supplement (doi:10.1039/d6nj01122e)
Supplement: d6nj01122e1.pdf [file d6nj01122e1.pdf]

## **Supporting Information**

### **Triazole Salicylaldehyde-Derived Organosilane as ‘Turn-On’ Fluorescence and Colorimetric Sensor for Ce(III): Synthesis, Anticancer and Molecular Docking Studies**

Gurjaspreet Singh<sup>a\*</sup>, Poonam<sup>a\*</sup>, Manraj Singh<sup>a</sup>, Baljinder Singh Gill<sup>b</sup>, Shipra Goyal<sup>b</sup>, Aman Bhalla<sup>a\*</sup>.

<sup>a</sup> *Department of Chemistry, Panjab University, Chandigarh, 160014, India.*

<sup>b</sup>Department of Biochemistry, Central University of Punjab, Bathinda, Punjab-151401, India.

*\*Corresponding authors*

Email: [gjpsingh@pu.ac.in](mailto:gjpsingh@pu.ac.in), [poonam17011994@gmail.com](mailto:poonam17011994@gmail.com), [amanbhalla@pu.ac.in](mailto:amanbhalla@pu.ac.in)

## Table of Contents

| <b>Entry</b>                                                                                                       | <b>Page no.</b> |
|--------------------------------------------------------------------------------------------------------------------|-----------------|
| <sup>1</sup> H NMR spectrum of compound <b>SS</b> in CDCl <sub>3</sub> recorded on 500 MHz instrument (Fig.S1)     | 3               |
| <sup>13</sup> C NMR spectrum of compound <b>SS</b> in CDCl <sub>3</sub> recorded on 126 MHz instrument (Fig.S2)    | 3               |
| Mass spectrum of compound <b>SS</b> (Fig.S3)                                                                       | 4               |
| IR spectrum of compound <b>SS</b> (Fig.S4)                                                                         | 4               |
| <sup>1</sup> H NMR spectrum of <b>SS-Ce(III)</b> Complex CDCl <sub>3</sub> recorded on 500 MHz instrument (Fig.S5) | 5               |
| Mass spectrum of <b>SS-Ce(III)</b> Complex (Fig.S6)                                                                | 6               |
| IR spectrum of <b>SS-Ce(III)</b> Complex (Fig.S7)                                                                  | 6               |

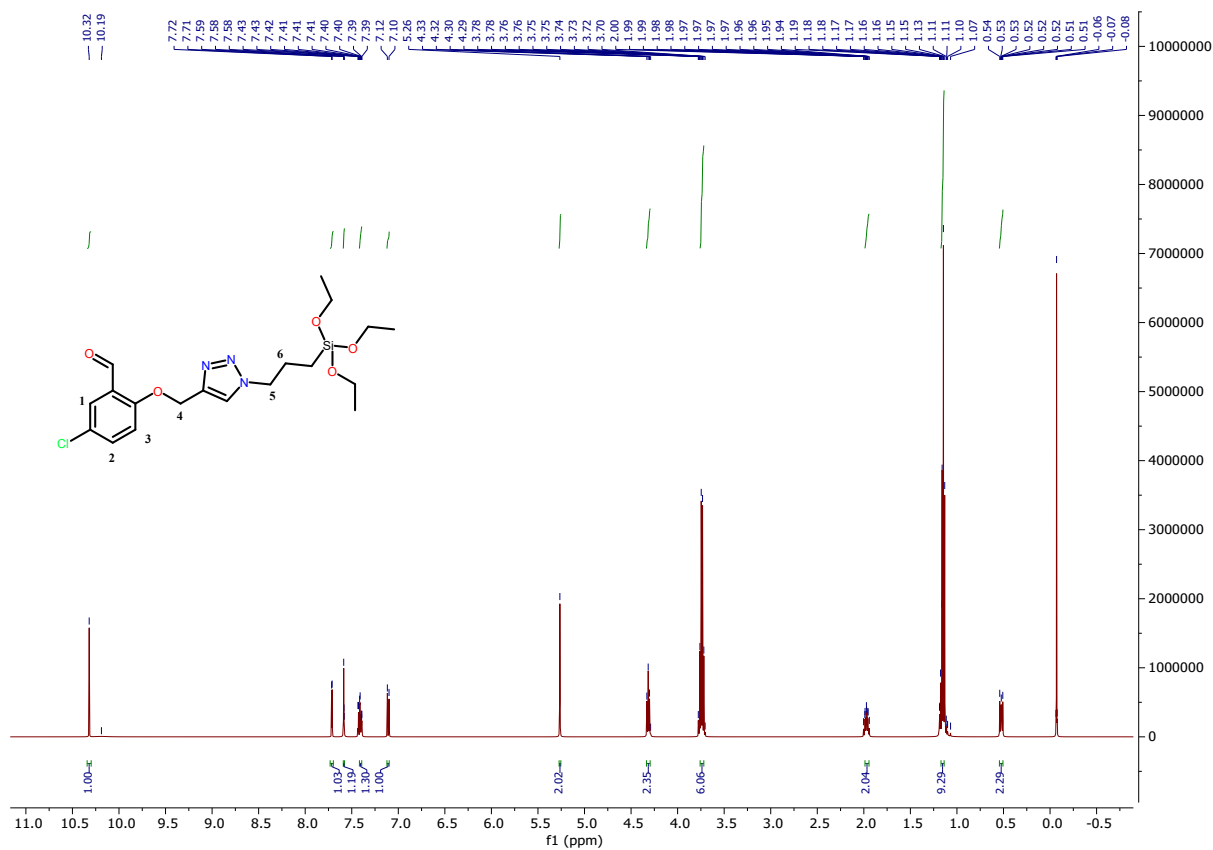

Fig.S1 <sup>1</sup>H NMR spectrum of compound SS in CDCl<sub>3</sub> recorded on 500 MHz instrument.

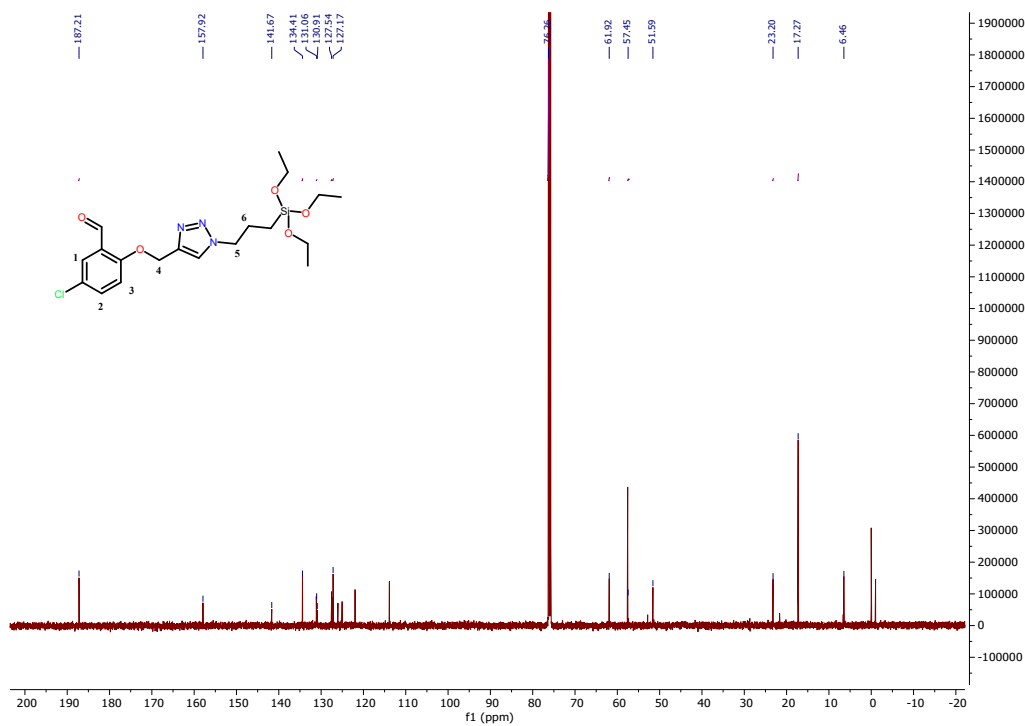

**Fig.S2**  $^{13}\text{C}$  NMR spectrum of compound SS in  $\text{CDCl}_3$  recorded on 126 MHz instrument

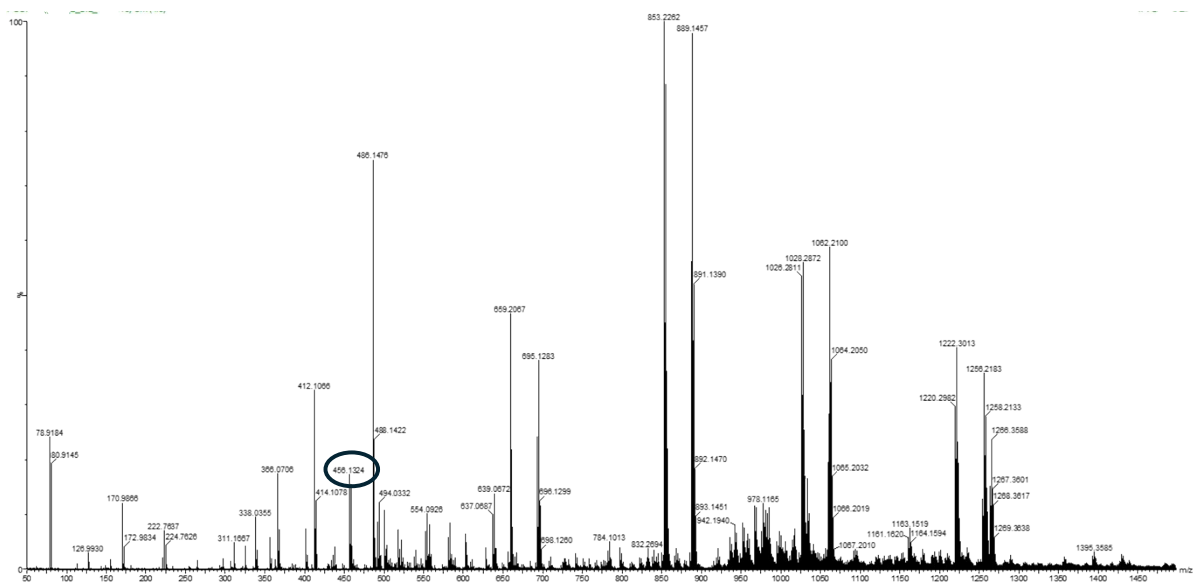

**Fig.S3** Mass spectrum of compound SS

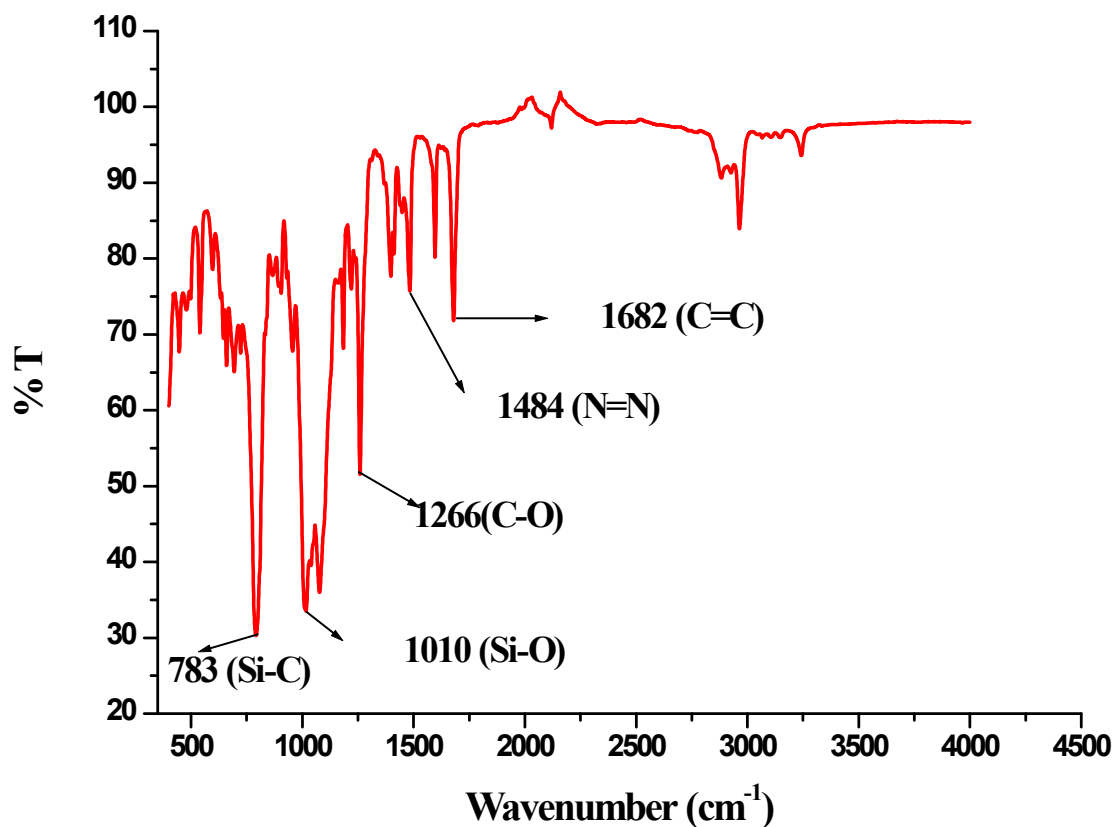

**Fig.S4** IR spectrum of compound SS.

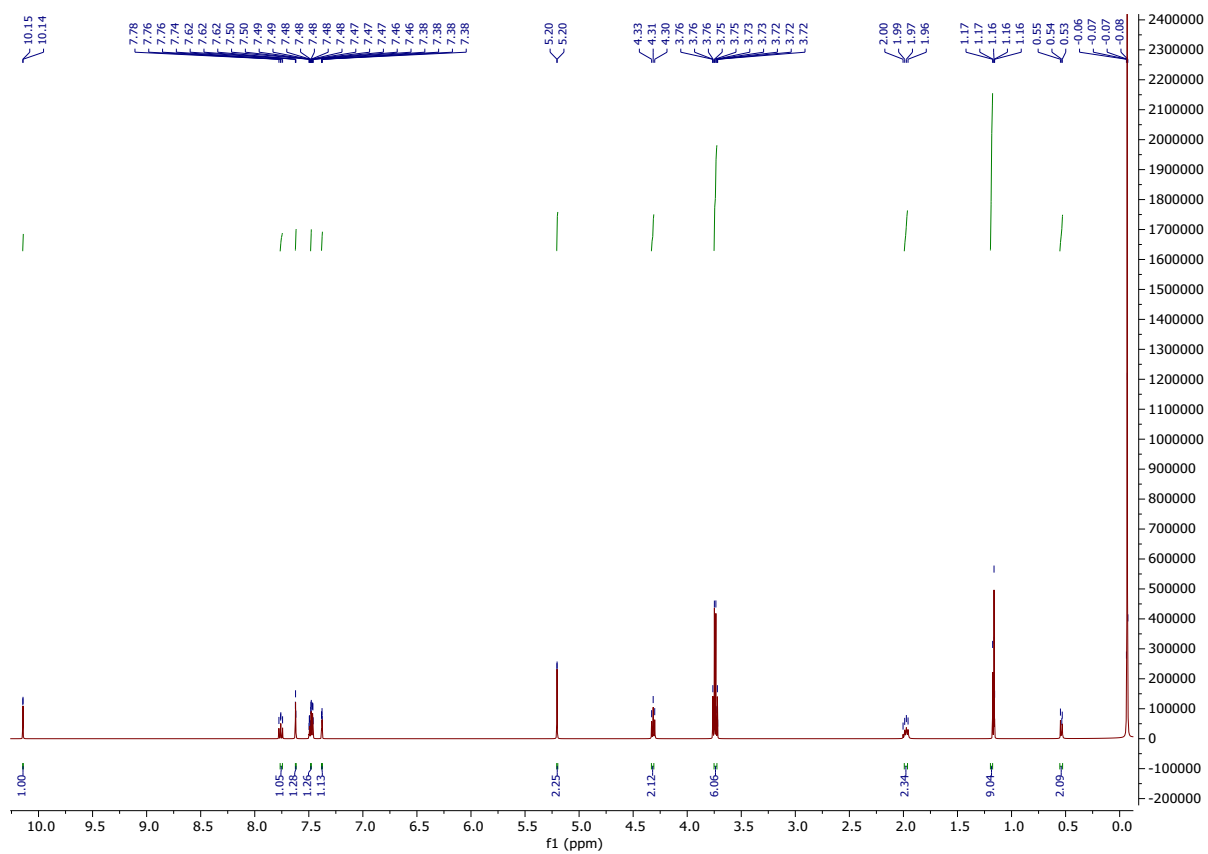

**Fig.S5** <sup>1</sup>H NMR spectrum of SS-Ce(III) Complex CDCl<sub>3</sub> recorded on 500 MHz instrument

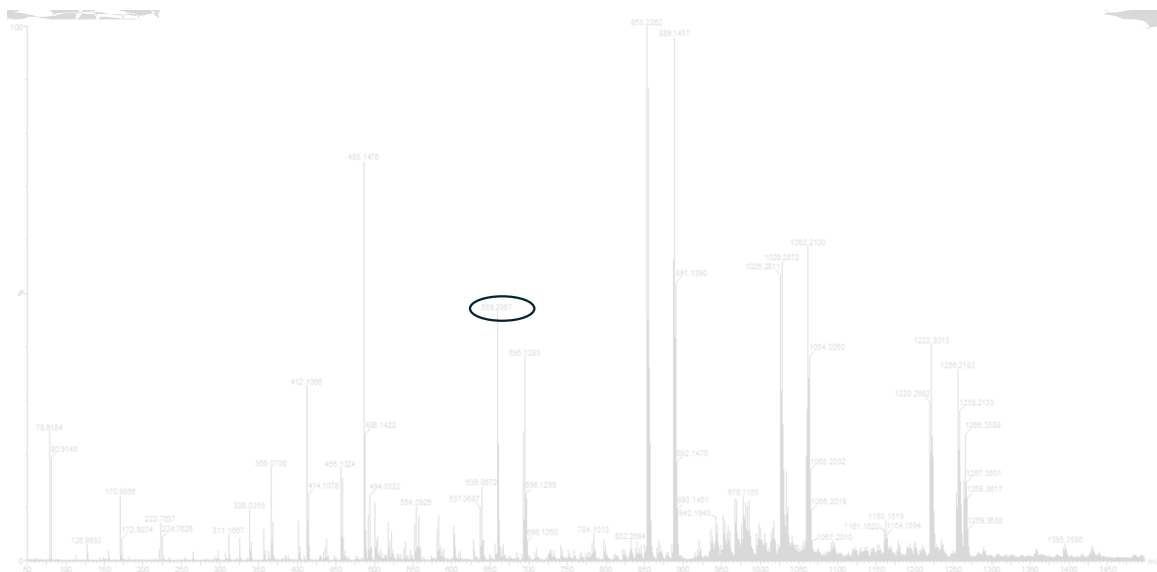

Fig.S6 Mass spectrum of SS-Ce(III) Complex

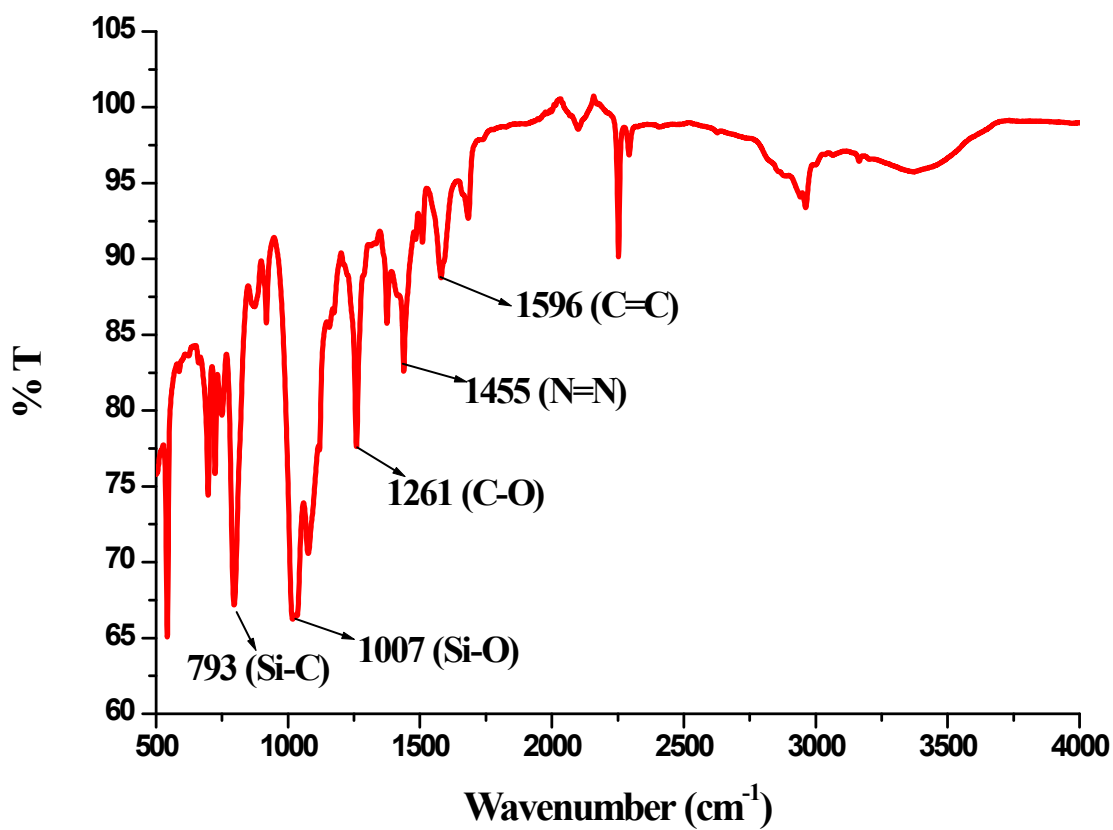

Fig.S7 IR spectrum of SS-Ce(III) Complex
